# Causality between Peripheral Immune Cell Counts and Membranous Nephropathy: A Bidirectional Mendelian Randomization Study

1 **Zhihang Su<sup>1</sup>, Liu Wen<sup>1†</sup>, Xiangning Feng<sup>2†</sup>, Qijun Wan<sup>1\*</sup>**

2 <sup>1</sup> Department of Nephrology, Shenzhen Second People's Hospital, the First Affiliated Hospital of  
3 Shenzhen University, Shenzhen, China

4 <sup>2</sup> NMPA Key Laboratory for Quality Monitoring and Evaluation of Vaccines and Biological  
5 Products, One Health Center of Excellence for Research and Training, School of Public Health, Sun  
6 Yat-Sen University, Guangzhou 510080, PR China

7 **\* Correspondence:**

8 Corresponding Author: Qijun Wan (Email: [qiyuan2224@sina.com](mailto:qiyuan2224@sina.com))

9

10 **Keywords:** Membranous nephropathy, Immune cell, Peripheral blood cell, Mendelian  
11 randomization, Genome-wide association studies (GWAS).

12

## 13 **Abstract**

14 **Background:**

15 Membranous nephropathy (MN), an autoimmune disease, has not yet been fully elucidated regarding  
16 its relationship with immune cells.

17 **Methods:**

18 As a primary method in this Mendelian randomization (MR) analysis, we employed the Inverse  
19 Variance Weighted (IVW), Wald Ratio (WR), Steiger filtering, Weighted Median, Weighted  
20 mode, MR-Egger, Mendelian randomization pleiotropy residual sum, and outlier (MR-PRESSO) and  
21 Leave-one-out sensitivity test. Reverse MR analysis was utilized to investigate whether MN affects  
22 immune cells.

23 **Results :**

24 After False Discovery Rate multiple correction (threshold was 10%), it was determined that  
25 CD45RA<sup>+</sup> CD8<sup>+</sup> T cell (IVW OR=1.074, 95%CI: 1.034-1.114, P=0.0001, P<sup>FDR</sup>=0.036), Effector  
26 Memory CD8<sup>+</sup> T cell (IVW OR=0.929, 95%CI: 0.895-0.964, P=0.0001, P<sup>FDR</sup>=0.036), HLA DR<sup>+</sup>  
27 CD8<sup>+</sup> T cell (IVW OR=0.921, 95%CI: 0.884-0.960, P=0.0001, P<sup>FDR</sup>=0.036) are significantly affected  
28 by MN. CD28<sup>+</sup> CD45RA<sup>-</sup> CD8<sup>+</sup> T cell (WR OR=0.513, 95%CI: 0.357-0.793, P=0.0003,  
29 P<sup>FDR</sup>=0.061), CD8 on Terminally Differentiated CD8<sup>+</sup> T cell (WR OR=0.378, 95%CI: 0.219-0.652,  
30 P=0.0005, P<sup>FDR</sup>=0.061), and HVEM on Effector Memory CD4<sup>+</sup> T cell (WR OR=0.378, 95%CI:  
31 0.219-0.652, P=0.0005, P<sup>FDR</sup>=0.065), among others, are considered immune cells that possess  
32 protective factors against MN. However, HLA DR on CD33<sup>+</sup> HLA DR<sup>+</sup> CD14<sup>-</sup> (WR OR=1.910,  
33 95%CI: 1.269-2.876, P=0.002, P<sup>FDR</sup>=0.065), CD80 on granulocyte (WR OR=2.606, 95%CI:

34 1.417-4.792,  $P=0.002$ ,  $P^{\text{FDR}}=0.065$ ), and CD62L<sup>+</sup> plasmacytoid Dendritic Cell (WR OR=1.508,  
35 95%CI: 1.138-1.998,  $P=0.004$ ,  $P^{\text{FDR}}=0.071$ ) pose a risk to MN. When increased by one standard  
36 deviation in peripheral blood, these immune cells positively or negatively impact the risk of MN with  
37 an odds ratio (OR).

38 **Conclusions:**

39 The MR analysis unveiled the association between immune cells and MN. We have deepened our  
40 understanding of the pathogenic mechanisms linking MN and immune cells and also identified new  
41 targets for immunotherapy in MN.

## 42 **1 Introduction**

43 Membranous nephropathy, an autoimmune disease, is characterized by the formation and deposition  
44 of immune complexes on the basement membrane, resulting in the thickening of glomerular capillary  
45 walls(van de Logt et al. 2019). This can lead to pathological and physiological disruptions of the  
46 podocyte structure, resulting in proteinuria. Some patients with membranous nephropathy experience  
47 mild symptoms. At the same time, severe cases may present with decreased serum albumin levels  
48 and generalized edema, known as nephrotic syndrome, and can progress to end-stage kidney disease.  
49 Approximately 80% of patients with membranous nephropathy (primary membranous nephropathy)  
50 have no identifiable cause(Couser 2017). In contrast, the remaining cases, known as secondary  
51 membranous nephropathy (SMN), are connected with other conditions such as lupus erythematosus,  
52 hepatitis B virus infection, and malignant growths. The main target antigens for primary membranous  
53 nephropathy are PLA2R, THSD7A, NELL1, SEMA3B, and PCDH7(Sethi 2021). While  
54 antigen-specific T cells and B cells have not yet been characterized in primary membranous  
55 nephropathy (PMN), autoantibodies targeting these antigens have been identified(Chung et al. 2022).  
56 Two-sample Mendelian randomization (MR) employs instrumental variables (IVs), which are proxy  
57 variables representing genetic variations, to simulate the causal impact of exposure on  
58 outcomes(Sekula et al. 2016). Typically, single nucleotide polymorphisms (SNPs) identified in  
59 genome-wide association studies (GWAS) are employed as genetic instruments to estimate the causal  
60 effect of exposure on outcomes(Sekula et al. 2016). Simultaneously, we aim to minimize the impact  
61 of confounding factors and reverse effects. Unlike traditional observational research, MR can  
62 mitigate the impact of confounding factors(Georgakis and Gill 2021). Previous studies have shown a  
63 correlation between membranous nephropathy and inflammation and the immune response(Ronco et  
64 al. 2021). Nevertheless, there is a lack of research analyzing the specific cell subpopulations  
65 associated with MN. Our study aims to establish the identity of the specific cell subpopulations  
66 connected with MN. The study design is depicted in Figure 1. Initially, we will employ MR using  
67 data from the Blood Cell Consortium(BCX) meta-analysis(Vuckovic et al. 2020), Peripheral Immune  
68 Cell GWAS summary statistics by Orr et al.(Orrù et al. 2020), and membranous nephropathy GWAS  
69 data from the Kiryluk Lab to identify the specific cell subpopulations associated with MN(Xie et al.  
70 2020).

## 71 **2 Methods and materials**

### 72 **2.1 Data of exposure**

73 The effect estimates of single nucleotide polymorphisms (SNPs) linked to peripheral blood cell  
74 counts, such as total leukocytes, lymphocytes, monocytes, neutrophils, eosinophils, and basophils,  
75 are obtained from the meta-analysis conducted by the Blood Cell Consortium (BCX), comprising  
76 data from 563,085 individuals of European descent(Vuckovic et al. 2020).

77 To analyze lymphocyte subpopulations, which encompass T cells [naïve, central memory (CM),  
78 effector memory (EM), terminally differentiated (TD), regulatory (Treg), and natural killer (NKT)  
79 cells], as well as B cells (naïve, unswitched memory, switched memory, and transitional memory  
80 cells), we employed GWAS data obtained from Orr et al. This study examined 3,757 individuals  
81 from the Sardinian founder population using flow cytometry(Orrù et al. 2020).

## 82 **2.2 Data of outcome**

83 We have chosen Idiopathic Membranous Nephropathy (IMN) as the outcome variable. The data was  
84 obtained from a Genome-Wide Association Study (GWAS) focused on primary IMN, involving 2150  
85 cases and 5829 controls across five European cohorts(Xie et al. 2020). All patients in the database  
86 diagnosed with membranous nephropathy were confirmed through kidney biopsy. Furthermore, the  
87 database excluded secondary factors such as drugs, malignant tumors, infections, or autoimmune  
88 diseases, ensuring the focus on IMN. The study population comprised individuals of European  
89 descent.

## 90 **2.3 Mendelian Randomization**

91 We conducted bidirectional MR to examine the causal connection between MN and peripheral blood  
92 cells as well as immune cell subpopulations. In cases where only one instrumental variable was  
93 available, we employed the Wald ratio (WR) as the primary method for Mendelian randomization  
94 (MR) analysis. In scenarios involving multiple instrumental variables, we utilized the inverse  
95 variance weighted (IVW) method as the main approach to estimate causal relationships. Additionally,  
96 we employed MR-Egger, Weight median, and Weighted mode as supplementary methods. Given the  
97 multiple analyses performed, there exists a potential for obtaining false positive results in Mendelian  
98 randomization (MR). We employed the false discovery rate (FDR) methodology for multiple tests to  
99 address this concern, setting the threshold at 10%(Van den Eynden et al. 2018; Kang et al. 2010;  
100 Bouras et al. 2022).

## 101 **2.4 Selection of instrumental variables**

102 Correlation: Our objective was to establish the individual associations of instrumental variables (IVs)  
103 with peripheral blood cells and lymphocyte subpopulations. We conducted a preliminary screening  
104 using a P-value threshold  $5e-08$ , which confirmed the robust correlation between the instrumental  
105 variables and the aforementioned exposures. IVs with  $F < 10$  [computed according to the F formula:  
106  $F = R^2(n - k - 1) / k(1 - R^2)$ ,  $F' = (\beta/SE)^2$ ] were excluded to strengthen the association between the  
107 instrumental variables and the exposures(Burgess, Thompson, and CRP CHD Genetics Collaboration  
108 2011; de Klerk et al. 2023).

109 Independence: To guarantee the independence of variations in the instrumental variables (IVs), we  
110 conducted clustering using the linkage disequilibrium (LD) reference panel derived from the 1000  
111 Genomes Project(“High-Coverage Whole-Genome Sequencing of the Expanded 1000 Genomes  
112 Project Cohort Including 602 Trios - PubMed” n.d.). At each locus, we retained the single nucleotide  
113 polymorphism (SNP) with the lowest p-value, excluding any other SNPs within a 10000 kb window  
114 with an  $R^2 < 0.001$  correlation with the IVs.

115 Exclusion criteria: We eliminated IVs with outcome p-values  $< 5e-05$ , as they could potentially be  
116 associated with MN. This step improved the accuracy of our MR analysis.

117 Confounding factors were identified using phenotype scanning. If a factor was found to influence  
118 both the exposure and the outcome simultaneously, it was excluded from subsequent analysis. We  
119 will exclude specific phenotypes, such as asthma, inflammatory bowel disease, and systemic lupus  
120 erythematosus, that can potentially impact peripheral blood immune cell counts.

121 The analysis encompassed a total of 790 instrumental variables.

## 122 **2.5 Sensitivity analysis and directional test**

123 After conducting the MR analysis, it is essential to validate the results through sensitivity analysis  
124 and directional tests. MR analysis is susceptible to issues such as horizontal pleiotropy,  
125 heterogeneity, and reverse causality. We employ the MR-Egger test and Mendelian randomization  
126 pleiotropy residual sum and outlier (MR-PRESSO) to evaluate the presence of horizontal pleiotropy  
127 in the instrumental variables. In order to examine heterogeneity in the instrumental variables, we  
128 utilize the IVW, MR-Egger, and Cochran's Q test. For directional tests, we employ the Steiger  
129 filtering test and reverse MR analysis. The Steiger filtering test is employed to ensure the accuracy of  
130 the positive direction. In the reverse MR analysis, we interchange the exposure and outcome  
131 variables and conduct MR analysis again.

## 132 **3 Results**

133 Using bidirectional Mendelian randomization, we observed no causal relationship between peripheral  
134 blood cell counts, specifically lymphocyte count and MN (Figure 2). Furthermore, we did identify  
135 causal relationships between specific lymphocyte subpopulations and MN (Figure 3). In the analysis  
136 results of this subgroup, which specifically examined the causal relationship between lymphocyte  
137 subpopulations and MN, After False Discovery Rate multiple correction (threshold was 10%), it was  
138 determined that CD45RA<sup>+</sup> CD8<sup>+</sup> T cell (IVW OR=1.074, 95%CI: 1.034-1.114, P=0.0001,  
139 P<sup>FDR</sup>=0.036), Effector Memory CD8<sup>+</sup> T cell (IVW OR=0.929, 95%CI: 0.895-0.964, P=0.0001,  
140 P<sup>FDR</sup>=0.036), HLA DR<sup>+</sup> CD8<sup>+</sup> T cell (IVW OR=0.921, 95%CI: 0.884-0.960, P=0.0002, P<sup>FDR</sup>=0.036)  
141 are significantly affected by MN. CD28<sup>+</sup> CD45RA<sup>-</sup> CD8<sup>+</sup> T cell (WR OR=0.513, 95%CI:  
142 0.357-0.793, P=0.0003, P<sup>FDR</sup>=0.070), HVEM on naive CD4<sup>+</sup> T cell (WR OR=0.591, 95%CI:  
143 0.420-0.833, P=0.0027, P<sup>FDR</sup>=0.070), and HVEM on CD8<sup>+</sup> T cell (WR OR=0.622, 95%CI:  
144 0.446-0.868, P=0.005, P<sup>FDR</sup>=0.082), among others, are considered immune cells that possess  
145 protective factors against MN. However, HLA DR on CD33<sup>+</sup> HLA DR<sup>+</sup> CD14<sup>-</sup> (WR OR=1.910,  
146 95%CI: 1.269-2.876, P=0.002, P<sup>FDR</sup>=0.070), CD80 on granulocyte (WR OR=2.606, 95%CI:  
147 1.417-4.792, P=0.002, P<sup>FDR</sup>=0.070), and CD62L<sup>-</sup> plasmacytoid Dendritic Cell (WR OR=1.508,  
148 95%CI: 1.138-1.998, P=0.004, P<sup>FDR</sup>=0.076) pose a risk to MN. When increased by one standard  
149 deviation in peripheral blood, these immune cells have a positive or negative impact on the risk of  
150 MN with an odds ratio (OR) as indicated. This suggests that an increase in the counts of specific  
151 lymphocyte subpopulations may increase the risk of developing MN. Conversely, MN patients may  
152 exhibit elevated counts of certain lymphocyte subpopulations, leading to downstream effects that  
153 could be associated with diseases related to these subpopulations. The sensitivity analysis conducted  
154 on the aforementioned MR results indicates that horizontal pleiotropy and heterogeneity can be  
155 disregarded (p > 0.05).

## 156 **4 Discussion**

157 Genome-wide association studies (GWAS) have recognized multiple reproducible genetic  
158 associations between common single nucleotide polymorphisms (SNPs) and both common  
159 autoimmune diseases and immune-mediated disorders(Cotsapas et al. 2011; Gutierrez-Arcelus, Rich,

160 and Raychaudhuri 2016). Some of these associations are observed across multiple phenotypes. From  
161 a genetic standpoint, this confirms the interconnectedness of these immune-related diseases. In  
162 clinical practice, it is frequently observed that certain cases, like systemic lupus erythematosus, can  
163 result in secondary membranous nephropathy(Mok 2009). Similarly, patients with idiopathic  
164 membranous nephropathy may concurrently develop autoimmune diseases, including systemic lupus  
165 erythematosus and rheumatoid arthritis(Miyazaki et al. 2023; Caza et al. 2021). However, during MR  
166 analysis, we treat these phenotypes, which have the potential to cause changes in immune cell counts,  
167 as confounding factors. Eliminating these confounding factors prior to analysis can produce more  
168 accurate results.

169 Although distinct diseases necessitate varying dosages, there is often an overlap in the  
170 utilization of immunosuppressants and hormones for their treatment(Lazar and Kahlenberg 2023;  
171 Burmester and Pope 2017). Therefore, it is imperative to comprehend the impact of their respective  
172 targets on gene regulation and immune function. Immunophenotypes, including signaling responses,  
173 immune cell abundance, and serum cytokine levels, have the potential to determine pivotal immune  
174 actions associated with the risk of autoimmune disorders. Consequently, the identification of crucial  
175 immunophenotypes and the elucidation of causal relationships between phenotypes have a critical  
176 impact on unraveling the mechanisms underlying autoimmune diseases and facilitating the provision  
177 of targeted immunotherapies tailored to specific immunophenotypes.

178 MN, classified as an autoimmune disease, exhibits a strong association with immune cells.  
179 However, in current research, distinguishing whether specific immunophenotypic changes are  
180 compensatory or causal poses a challenge. One of the focal points of our investigation pertains to the  
181 difficulty in discerning the abundance of immune cell subsets that exhibit upstream or downstream  
182 relationships with MN. In this study, we have undertaken an unprecedented approach by integrating  
183 peripheral blood cell count levels with GWAS data of MN for MR analysis. Our MR analysis has  
184 revealed causal associations between specific immune cell subsets in peripheral blood and MN.  
185 These cells, having established causal relationships, can act as either upstream or downstream factors  
186 in the context of membranous nephropathy. By targeting immune cell subsets associated with  
187 upstream factors, potential avenues for immunotherapy can be identified, while those linked to  
188 downstream factors hold promise for understanding the development of subsequent conditions  
189 following membranous nephropathy. B cells, T cells, autoantibodies, cytokines, and complement  
190 system activation collectively contribute to the pathogenesis of MN. An imbalance in the regulatory  
191 T cell population is recognized as a prominent characteristic among untreated membranous  
192 nephropathy patients(Motavalli et al. 2021). T cells can be divided into three categories according to  
193 their activation stages: naïve T cells, effector T cells, and memory T cells. MR analysis results  
194 suggest that a decrease in the peripheral blood count of specific CD4+ T cell subsets could  
195 potentially increase the risk of MN. In related studies, idiopathic membranous nephropathy patients  
196 included in the study exhibited peripheral lymphocytes. Although there were no significant  
197 differences in the numbers of peripheral lymphocytes, T cells, and B cells between the two groups, an  
198 elevated percentage of CD4+ T cells was observed(Kuroki et al. 2005). Our preliminary inference  
199 aligns with these findings, even though the CD4+ T cells in our study were not further divided into T  
200 cell subsets.

201 Studies employing immune cell infiltration analysis have demonstrated significantly higher  
202 numbers of CD4 T cells, CD8 T cells, natural killer (NK) cells, monocytes, and macrophages in the  
203 renal tissue of membranous nephropathy patients compared to healthy tissue (P<0.001).



204 Our findings indicate that an increase in the peripheral blood level of CD80 in granulocytes is  
205 associated with an elevated risk of developing membranous nephropathy. CD80 plays a role in innate  
206 and adaptive immune activation and has been implicated in the pathogenesis of renal disease  
207 syndromes. The excessive secretion of cytokines by activated granulocytes can promote  
208 inflammation and immune responses, ultimately leading to the deposition of immune complexes in  
209 podocytes and resulting in symptoms such as proteinuria.

210 It is worth noting that CD80 (also known as B7-1) is primarily expressed on antigen-presenting  
211 cells and acts as a critical co-stimulatory molecule for T cell activation by binding to the T cell  
212 surface receptor CTLA-4. A study involving pediatric and adult patients demonstrated elevated  
213 urinary CD80 levels in various glomerular diseases, particularly those with a urinary  
214 protein/creatinine ratio  $\geq 3\text{g/g}$  (“Urinary CD80 Discriminates Among Glomerular Disease Types and  
215 Reflects Disease Activity - PubMed” n.d.). Interestingly, even in lupus nephritis patients with high  
216 levels of proteinuria, urinary CD80 was found to be elevated. However, our research indicates that  
217 urinary CD80 is positively correlated with proteinuria and negatively correlated with serum albumin  
218 levels, suggesting its potential as a marker for podocyte injury (Zen et al. 2023).

219 The count of plasmacytoid dendritic cells (pDCs) has also been found to be associated with an  
220 increased risk of membranous nephropathy. However, currently, there is a lack of specific research  
221 exploring the relationship between membranous nephropathy and dendritic cells.

222 Conventional dendritic cells type 1 (cDC1) represent a subset of dendritic cells that are  
223 primarily involved in cross-presentation to CD8 T cells. Several studies have indicated that the  
224 number of cDC1 is associated with the severity of various renal conditions, including acute tubular  
225 necrosis, the presence of crescents in immune-mediated glomerulonephritis, interstitial fibrosis in  
226 IgA nephropathy and lupus nephritis, as well as the prognosis of IgA nephropathy (Chen et al. 2021).  
227 In immune-mediated glomerulonephritis, there is a robust correlation between the number of cDC1  
228 and crescent formation. The abundance of cDC1 in the periglomerular and intraglomerular regions  
229 suggests their potential involvement in crescent formation, which may be relevant to some instances  
230 of membranous nephropathy associated with crescent formation.

231 An increase in the count of CD4+ T cells expressing HVEM (Herpesvirus entry mediator) has  
232 been shown to be connected to a reduced risk of developing MN. In this context, we would like to  
233 introduce the BTLA/HVEM pathway, which is primarily associated with tumor immunity (Yu et al.  
234 2019; “BTLA-HVEM Couple in Health and Diseases: Insights for Immunotherapy in Lung Cancer -  
235 PubMed” n.d.). The BTLA (B and T lymphocyte attenuator) molecule acts as a co-inhibitory receptor  
236 that inhibits T cell receptor (TCR) signaling in T lymphocytes by recruiting Shp1 and Shp2, which  
237 are phosphatases involved in downregulating signaling pathways. Within this pathway, HVEM  
238 serves as the ligand for BTLA and can also bind to other molecules such as LIGHT  
239 (lymphotoxin-like, exhibits inducible expression, and competes with HSV glycoprotein D for  
240 HVEM) or lymphotoxin-alpha ( $\text{LT}\alpha$ ). These interactions can trigger co-stimulatory signals or bind to  
241 CD160, another co-inhibitory receptor, at different binding sites. Additionally, HVEM can bind to  
242 the glycoprotein D of Herpes Simplex Virus (HSV).

243 The involvement of the BTLA/HVEM pathway and its relationship with CD4+ T cells expressing  
244 HVEM in membranous nephropathy is an area that requires further research and investigation.

245 Please note that the information provided here is a general overview and may not encompass the  
246 entire complexity of the BTLA/HVEM pathway or its specific involvement in membranous  
247 nephropathy.

248 An increase in the count of CD4+ T cells expressing HVEM can lead to an increase in the  
249 availability of the HVEM ligand. This ligand, in turn, can bind to cytokines unrelated to the  
250 pathogenesis of membranous nephropathy and exert effects that antagonize the disease process.

251 Furthermore, LT- $\alpha$  (TNF- $\beta$ ) and TNF- $\alpha$  are closely related structurally as homologs(Aggarwal,  
252 Moffat, and Harkins 1984; Aggarwal, Eessalu, and Hass 1985). TNF- $\beta$  belongs to the TNF  
253 superfamily and shares similarities with TNF- $\alpha$  regarding its ability to activate apoptosis and  
254 inflammatory signaling(Etemadi et al. 2013). Similar to TNF- $\alpha$ , TNF- $\beta$  signals through the  
255 lymphotoxin  $\beta$  receptor (LT $\beta$ R) and can activate both classical and non-classical NF- $\kappa$ B signaling  
256 pathways. Additionally, an international genetic study on membranous nephropathy has identified  
257 two previously unreported loci, NFKB1 and IRF4, that are associated with inflammation  
258 pathways(Xie et al. 2020).

259 There have been studies demonstrating the association between TNF- $\alpha$  and membranous  
260 nephropathy. Firstly, genetic polymorphisms in the TNF- $\alpha$  gene have been found to be associated  
261 with membranous nephropathy(Thibaudin et al. 2007). Secondly, serum levels of TNF- $\alpha$  have been  
262 observed to be increased in patients with MN and other kidney diseases(Roca et al. 2021).

263 The MR results indicate that there is no causal association between the peripheral blood count of  
264 various CD20-expressing B cell subsets and the risk of developing MN. This finding supports the  
265 rationale behind using rituximab (RTX) treatment for MN, as RTX aims to block antibody  
266 production by eliminating antibody-producing plasma cells. However, it is essential to note that this  
267 treatment approach may face challenges such as drug resistance and varying effectiveness.

268 Research has indicated that patients with membranous nephropathy have significantly higher counts  
269 of plasma cells and regulatory B cells compared to disease-free individuals. Additionally, the  
270 expansion of PLA2R-specific memory B cells in vitro has been associated with circulating PLA2R  
271 antibody titers(Cantarelli et al. 2020). These findings suggest a compensatory response during the  
272 progression of the disease.

273 Our study possesses several strengths. It represents an innovative endeavor of considerable  
274 importance in elucidating the potential influence of genetic susceptibility on changes in peripheral  
275 blood cell and immune cell counts in relation to the risk of MN. This aspect remains unexplored in  
276 previous MR studies. Our study employed genetic instrumental variables that exhibit strong  
277 associations with the exposure. Moreover, these instrumental variables were chosen to be  
278 independent of the exposure, outcome, and relevant confounding factors. To mitigate bias in the MR  
279 analysis, we adjusted parameters to fulfill the three key assumptions of instrumental variable  
280 selection.

281 However, our study does have certain limitations: In addition to the inherent limitations linked  
282 to the requisite assumptions for causal interpretation in MR studies, we did not extensively explore  
283 the downstream effects of membranous nephropathy in our research due to the limited advancements  
284 in this domain and the unavailability of relevant information. Nonetheless, this underscores a  
285 potential avenue for future investigation. Lastly, owing to the limited representation of other  
286 ethnicities, the applicability of our study results is restricted to the European population. Future  
287 research is required to extend these findings to encompass other ethnic groups.

288 In conclusion, our study has significantly contributed to advancing our comprehension of  
289 membranous nephropathy. Nonetheless, addressing the aforementioned limitations and enhancing the  
290 generalizability of these findings to diverse populations necessitate further research endeavors.

## 291 **5 Conclusion**

292 Through MR, we have identified specific immune cell subsets that are associated with membranous  
293 nephropathy. These subsets were then analyzed for their upstream and downstream relationships with  
294 the disease process. This comprehensive analysis has significantly expanded our understanding of the  
295 complex pathophysiology of MN. Furthermore, this new knowledge has opened up potential new  
296 avenues for immunotherapy in the treatment of MN.

## 297 **6 Conflict of Interest**

298 The authors declare that the research was conducted in the absence of any commercial or financial  
299 relationships that could be construed as a potential conflict of interest.

## 300 **7 Funding**

301 Shenzhen Key Medical Discipline Construction Fund (SZXK009).

## 302 **8 Acknowledgments**

303 This is a short text to acknowledge the contributions of specific colleagues, institutions, or agencies  
304 that aided the efforts of the authors.

## 305 **9 Data Availability Statement**

306 The datasets (analyzed) for this study can be found in the supplementary document. The datasets  
307 (generated) for this study can be found in the address as follow:  
308 Membranous nephropathy data can be obtained from:  
309 <https://gwas.mrcieu.ac.uk/datasets/ebi-a-GCST010005/> . Immune cell data can be obtained from:  
310 <https://www.ebi.ac.uk/gwas/publications/32929287> . Peripheral blood cell data can be obtained from:  
311 <https://gwas.mrcieu.ac.uk/datasets/ieu-b-29/> , <https://gwas.mrcieu.ac.uk/datasets/ieu-b-30/> ,  
312 <https://gwas.mrcieu.ac.uk/datasets/ieu-b-31/> , <https://gwas.mrcieu.ac.uk/datasets/ieu-b-32/> ,  
313 <https://gwas.mrcieu.ac.uk/datasets/ieu-b-33/> , <https://gwas.mrcieu.ac.uk/datasets/ieu-b-34/> .

## 314 **10 References**

- 315 Aggarwal, B. B., T. E. Eessalu, and P. E. Hass. 1985. "Characterization of Receptors for Human  
316 Tumour Necrosis Factor and Their Regulation by Gamma-Interferon." *Nature* 318 (6047):  
317 665–67. <https://doi.org/10.1038/318665a0>.
- 318 Aggarwal, B. B., B. Moffat, and R. N. Harkins. 1984. "Human Lymphotoxin. Production by a  
319 Lymphoblastoid Cell Line, Purification, and Initial Characterization." *The Journal of*  
320 *Biological Chemistry* 259 (1): 686–91.
- 321 Bouras, Emmanouil, Ville Karhunen, Dipender Gill, Jian Huang, Philip C. Haycock, Marc J. Gunter,  
322 Mattias Johansson, et al. 2022. "Circulating Inflammatory Cytokines and Risk of Five  
323 Cancers: A Mendelian Randomization Analysis." *BMC Medicine* 20 (1): 3.  
324 <https://doi.org/10.1186/s12916-021-02193-0>.



- 325 “BTLA-HVEM Couple in Health and Diseases: Insights for Immunotherapy in Lung Cancer -  
326 PubMed.” n.d. Accessed November 26, 2023. <https://pubmed.ncbi.nlm.nih.gov/34532285/>.
- 327 Burgess, Stephen, Simon G. Thompson, and CRP CHD Genetics Collaboration. 2011. “Avoiding  
328 Bias from Weak Instruments in Mendelian Randomization Studies.” *International Journal of*  
329 *Epidemiology* 40 (3): 755–64. <https://doi.org/10.1093/ije/dyr036>.
- 330 Burmester, Gerd R., and Janet E. Pope. 2017. “Novel Treatment Strategies in Rheumatoid Arthritis.”  
331 *Lancet (London, England)* 389 (10086): 2338–48.  
332 [https://doi.org/10.1016/S0140-6736\(17\)31491-5](https://doi.org/10.1016/S0140-6736(17)31491-5).
- 333 Cantarelli, Chiara, Marta Jarque, Andrea Angeletti, Joaquin Manrique, Susan Hartzell, Timothy  
334 O’Donnell, Elliot Merritt, et al. 2020. “A Comprehensive Phenotypic and Functional Immune  
335 Analysis Unravels Circulating Anti-Phospholipase A2 Receptor Antibody Secreting Cells in  
336 Membranous Nephropathy Patients.” *Kidney International Reports* 5 (10): 1764–76.  
337 <https://doi.org/10.1016/j.ekir.2020.07.028>.
- 338 Caza, Tiffany N., Samar I. Hassen, Zeljko Dvanajscak, Michael Kuperman, Rick Edmondson,  
339 Christian Herzog, Aaron Storey, et al. 2021. “NELL1 Is a Target Antigen in  
340 Malignancy-Associated Membranous Nephropathy.” *Kidney International* 99 (4): 967–76.  
341 <https://doi.org/10.1016/j.kint.2020.07.039>.
- 342 Chen, Titi, Qi Cao, Ruifeng Wang, Guoping Zheng, Farhana Azmi, Jeffery Wang, Vincent W. Lee,  
343 et al. 2021. “Conventional Type 1 Dendritic Cells (cDC1) in Human Kidney Diseases:  
344 Clinico-Pathological Correlations.” *Frontiers in Immunology* 12: 635212.  
345 <https://doi.org/10.3389/fimmu.2021.635212>.
- 346 Chung, Edmund Y. M., Yuan M. Wang, Karen Keung, Min Hu, Hugh McCarthy, Germaine Wong,  
347 Lukas Kairaitis, Bhadrans Bose, David C. H. Harris, and Stephen I. Alexander. 2022.  
348 “Membranous Nephropathy: Clearer Pathology and Mechanisms Identify Potential Strategies  
349 for Treatment.” *Frontiers in Immunology* 13: 1036249.  
350 <https://doi.org/10.3389/fimmu.2022.1036249>.
- 351 Cotsapas, Chris, Benjamin F. Voight, Elizabeth Rossin, Kasper Lage, Benjamin M. Neale, Chris  
352 Wallace, Gonçalo R. Abecasis, et al. 2011. “Pervasive Sharing of Genetic Effects in  
353 Autoimmune Disease.” *PLoS Genetics* 7 (8): e1002254.  
354 <https://doi.org/10.1371/journal.pgen.1002254>.
- 355 Couser, William G. 2017. “Primary Membranous Nephropathy.” *Clinical Journal of the American*  
356 *Society of Nephrology: CJASN* 12 (6): 983–97. <https://doi.org/10.2215/CJN.11761116>.
- 357 Etemadi, Nima, Jessica K. Holien, Diep Chau, Grant Dewson, James M. Murphy, Warren S.  
358 Alexander, Michael W. Parker, John Silke, and Ueli Nachbur. 2013. “Lymphotoxin  $\alpha$  Induces  
359 Apoptosis, Necroptosis and Inflammatory Signals with the Same Potency as Tumour Necrosis  
360 Factor.” *The FEBS Journal* 280 (21): 5283–97. <https://doi.org/10.1111/febs.12419>.
- 361 Georgakis, Marios K., and Dipender Gill. 2021. “Mendelian Randomization Studies in Stroke:  
362 Exploration of Risk Factors and Drug Targets With Human Genetic Data.” *Stroke* 52 (9):  
363 2992–3003. <https://doi.org/10.1161/STROKEAHA.120.032617>.
- 364 Gutierrez-Arcelus, Maria, Stephen S. Rich, and Soumya Raychaudhuri. 2016. “Autoimmune  
365 Diseases - Connecting Risk Alleles with Molecular Traits of the Immune System.” *Nature*  
366 *Reviews. Genetics* 17 (3): 160–74. <https://doi.org/10.1038/nrg.2015.33>.

- 367 “High-Coverage Whole-Genome Sequencing of the Expanded 1000 Genomes Project Cohort  
368 Including 602 Trios - PubMed.” n.d. Accessed November 14, 2023.  
369 <https://pubmed.ncbi.nlm.nih.gov/36055201/>.
- 370 Kang, Un-Beom, Younghee Ahn, Jong Won Lee, Yong-Hak Kim, Joon Kim, Myeong-Hee Yu,  
371 Dong-Young Noh, and Cheolju Lee. 2010. “Differential Profiling of Breast Cancer Plasma  
372 Proteome by Isotope-Coded Affinity Tagging Method Reveals Biotinidase as a Breast Cancer  
373 Biomarker.” *BMC Cancer* 10 (1): 114. <https://doi.org/10.1186/1471-2407-10-114>.
- 374 Klerk, Juliette A. de, Joline W. J. Beulens, Hailiang Mei, Roel Bijkerk, Anton Jan van Zonneveld,  
375 Robert W. Koivula, Petra J. M. Elders, Leen M. ’t Hart, and Roderick C. Slieker. 2023.  
376 “Altered Blood Gene Expression in the Obesity-Related Type 2 Diabetes Cluster May Be  
377 Causally Involved in Lipid Metabolism: A Mendelian Randomisation Study.” *Diabetologia*  
378 66 (6): 1057–70. <https://doi.org/10.1007/s00125-023-05886-8>.
- 379 Kuroki, Aki, Masayuki Iyoda, Takanori Shibata, and Tetsuzo Sugisaki. 2005. “Th2 Cytokines  
380 Increase and Stimulate B Cells to Produce IgG4 in Idiopathic Membranous Nephropathy.”  
381 *Kidney International* 68 (1): 302–10. <https://doi.org/10.1111/j.1523-1755.2005.00415.x>.
- 382 Lazar, Stephanie, and J. Michelle Kahlenberg. 2023. “Systemic Lupus Erythematosus: New  
383 Diagnostic and Therapeutic Approaches.” *Annual Review of Medicine* 74 (January): 339–52.  
384 <https://doi.org/10.1146/annurev-med-043021-032611>.
- 385 Logt, Anne-Els van de, Maryline Fresquet, Jack F. Wetzels, and Paul Brenchley. 2019. “The  
386 Anti-PLA2R Antibody in Membranous Nephropathy: What We Know and What Remains  
387 a Decade after Its Discovery.” *Kidney International* 96 (6): 1292–1302.  
388 <https://doi.org/10.1016/j.kint.2019.07.014>.
- 389 Miyazaki, Reina, Hiroyuki Ueda, Ayaka Hayashi, Masahiro Okabe, Ai Katsuma, Akihiro Shimizu,  
390 Kensuke Joh, et al. 2023. “Neural Epidermal Growth Factor-Like 1-Positive Membranous  
391 Nephropathy With Rheumatoid Arthritis.” *Kidney International Reports* 8 (4): 921–24.  
392 <https://doi.org/10.1016/j.ekir.2022.12.026>.
- 393 Mok, Chi Chiu. 2009. “Membranous Nephropathy in Systemic Lupus Erythematosus: A Therapeutic  
394 Enigma.” *Nature Reviews. Nephrology* 5 (4): 212–20.  
395 <https://doi.org/10.1038/nrneph.2009.14>.
- 396 Motavalli, Roza, Jalal Etemadi, Mohammad Sadegh Soltani-Zangbar, Mohamad-Reza Ardalani,  
397 Houman Kahroba, Leila Roshangar, Mohammad Nouri, et al. 2021. “Altered Th17/Treg Ratio  
398 as a Possible Mechanism in Pathogenesis of Idiopathic Membranous Nephropathy.” *Cytokine*  
399 141 (May): 155452. <https://doi.org/10.1016/j.cyto.2021.155452>.
- 400 Orrù, Valeria, Maristella Steri, Carlo Sidore, Michele Marongiu, Valentina Serra, Stefania Olla,  
401 Gabriella Sole, et al. 2020. “Complex Genetic Signatures in Immune Cells Underlie  
402 Autoimmunity and Inform Therapy.” *Nature Genetics* 52 (10): 1036–45.  
403 <https://doi.org/10.1038/s41588-020-0684-4>.
- 404 Roca, Neus, Cristina Martinez, Elias Jatem, Alvaro Madrid, Mercedes Lopez, and Alfons Segarra.  
405 2021. “Activation of the Acute Inflammatory Phase Response in Idiopathic Nephrotic  
406 Syndrome: Association with Clinicopathological Phenotypes and with Response to  
407 Corticosteroids.” *Clinical Kidney Journal* 14 (4): 1207–15.  
408 <https://doi.org/10.1093/ckj/sfaa247>.
- 409 Ronco, Pierre, Laurence Beck, Hanna Debiec, Fernando C. Fervenza, Fan Fan Hou, Vivekanand Jha,  
410 Sanjeev Sethi, Allison Tong, Marina Vivarelli, and Jack Wetzels. 2021. “Membranous

- 411 Nephropathy.” *Nature Reviews Disease Primers* 7 (1): 69.  
412 <https://doi.org/10.1038/s41572-021-00303-z>.
- 413 Sekula, Peggy, Fabiola Del Greco M, Cristian Pattaro, and Anna Köttgen. 2016. “Mendelian  
414 Randomization as an Approach to Assess Causality Using Observational Data.” *Journal of*  
415 *the American Society of Nephrology: JASN* 27 (11): 3253–65.  
416 <https://doi.org/10.1681/ASN.2016010098>.
- 417 Sethi, Sanjeev. 2021. “New ‘Antigens’ in Membranous Nephropathy.” *Journal of the American*  
418 *Society of Nephrology: JASN* 32 (2): 268–78. <https://doi.org/10.1681/ASN.2020071082>.
- 419 Thibaudin, D., L. Thibaudin, P. Berthoux, C. Mariat, J.-P. Filippis, B. Laurent, E. Alamartine, and F.  
420 Berthoux. 2007. “TNFA2 and D2 Alleles of the Tumor Necrosis Factor Alpha Gene  
421 Polymorphism Are Associated with Onset/Occurrence of Idiopathic Membranous  
422 Nephropathy.” *Kidney International* 71 (5): 431–37. <https://doi.org/10.1038/sj.ki.5002054>.
- 423 “Urinary CD80 Discriminates Among Glomerular Disease Types and Reflects Disease Activity -  
424 PubMed.” n.d. Accessed November 26, 2023. <https://pubmed.ncbi.nlm.nih.gov/33163723/>.
- 425 Van den Eynden, Jimmy, Ganesh Umapathy, Arghavan Ashouri, Diana Cervantes-Madrid, Joanna  
426 Szydzik, Kristina Ruuth, Jan Koster, et al. 2018. “Phosphoproteome and Gene Expression  
427 Profiling of ALK Inhibition in Neuroblastoma Cell Lines Reveals Conserved Oncogenic  
428 Pathways.” *Science Signaling* 11 (557): eaar5680. <https://doi.org/10.1126/scisignal.aar5680>.
- 429 Vuckovic, Dragana, Erik L. Bao, Parsa Akbari, Caleb A. Lareau, Abdou Mousas, Tao Jiang,  
430 Ming-Huei Chen, et al. 2020. “The Polygenic and Monogenic Basis of Blood Traits and  
431 Diseases.” *Cell* 182 (5): 1214-1231.e11. <https://doi.org/10.1016/j.cell.2020.08.008>.
- 432 Xie, Jingyuan, Lili Liu, Nikol Mladkova, Yifu Li, Hong Ren, Weiming Wang, Zhao Cui, et al. 2020.  
433 “The Genetic Architecture of Membranous Nephropathy and Its Potential to Improve  
434 Non-Invasive Diagnosis.” *Nature Communications* 11 (1): 1600.  
435 <https://doi.org/10.1038/s41467-020-15383-w>.
- 436 Yu, Xueping, Yijuan Zheng, Richeng Mao, Zhijun Su, and Jiming Zhang. 2019. “BTLA/HVEM  
437 Signaling: Milestones in Research and Role in Chronic Hepatitis B Virus Infection.”  
438 *Frontiers in Immunology* 10: 617. <https://doi.org/10.3389/fimmu.2019.00617>.
- 439 Zen, Renata de Cássia, Wagner Vasques Dominguez, Ivone Braga, Luciene Machado Dos Reis,  
440 Lectícia Barbosa Jorge, Luis Yu, Viktoria Woronik, and Cristiane Bitencourt Dias. 2023.  
441 “Urinary CD80 and Serum suPAR as Biomarkers of Glomerular Disease among Adults in  
442 Brazil.” *Diagnostics (Basel, Switzerland)* 13 (2): 203.  
443 <https://doi.org/10.3390/diagnostics13020203>.

444

445

446

447

448

449

450 Figure legends:

451 Figure 1:

452 Flowchart for the Mendelian randomization analysis exploring effects of blood cell counts on  
453 membranous nephropathy. SNP, single nucleotide polymorphism; Leu, leukocyte; Lym, lymphocyte;  
454 Mono, monocyte; Neutro, neutrophil; Eosino, Eosinophil; Baso, basophil; IVW, Inverse variance  
455 weighted; MR-PRESSO, Mendelian Randomization Pleiotropy RESidual Sum and Outlier.

456 Figure 2:

457 Mendelian randomization results of the association between blood cell counts and risk of  
458 membranous nephropathy. OR, odds ratio; CI, confidence interval.

459 Figure 3:

460 Mendelian randomization results of the association between immune cell counts and risk of  
461 membranous nephropathy. WR, Wald ratio; IVW, Inverse variance weighted; OR, odds ratio; CI,  
462 confidence interval; MN, membranous nephropathy; FDR, false discovery rate.

463

464

| Exposure                                      | Outcome                     | No.of.SNP | Method |  | OR(95% CI)          | P     | P_FDR |
|-----------------------------------------------|-----------------------------|-----------|--------|--|---------------------|-------|-------|
| CD28+ CD45RA- CD8+ T cell                     | MN                          | 1         | WR     |  | 0.51 (0.36 to 0.74) | 0.000 | 0.070 |
| HVEM on T cell                                | MN                          | 1         | WR     |  | 0.63 (0.47 to 0.86) | 0.003 | 0.070 |
| HVEM on Effector Memory CD8+ T cell           | MN                          | 1         | WR     |  | 0.63 (0.47 to 0.86) | 0.003 | 0.070 |
| HVEM on CD4+ T cell                           | MN                          | 1         | WR     |  | 0.64 (0.48 to 0.86) | 0.003 | 0.070 |
| HVEM on Central Memory CD4+ T cell            | MN                          | 1         | WR     |  | 0.63 (0.47 to 0.86) | 0.003 | 0.070 |
| HVEM on naive CD4+ T cell                     | MN                          | 1         | WR     |  | 0.59 (0.42 to 0.83) | 0.003 | 0.070 |
| HVEM on Effector Memory CD4+ T cell           | MN                          | 1         | WR     |  | 0.63 (0.48 to 0.85) | 0.002 | 0.070 |
| HVEM on CD45RA- CD4+ T cell                   | MN                          | 1         | WR     |  | 0.65 (0.49 to 0.87) | 0.003 | 0.070 |
| HVEM on Central Memory CD8+ T cell            | MN                          | 1         | WR     |  | 0.66 (0.50 to 0.87) | 0.003 | 0.070 |
| CD80 on granulocyte                           | MN                          | 1         | WR     |  | 2.61 (1.42 to 4.79) | 0.002 | 0.070 |
| HLA DR on CD33+ HLA DR+ CD14-                 | MN                          | 1         | WR     |  | 1.61 (1.17 to 2.21) | 0.003 | 0.070 |
| CD62L- plasmacytoid Dendritic Cell            | MN                          | 1         | WR     |  | 1.51 (1.14 to 2.00) | 0.004 | 0.076 |
| HVEM on Terminally Differentiated CD4+ T cell | MN                          | 1         | WR     |  | 0.60 (0.42 to 0.86) | 0.005 | 0.082 |
| HVEM on CD8+ T cell                           | MN                          | 1         | WR     |  | 0.62 (0.45 to 0.87) | 0.005 | 0.082 |
| MN                                            | CD45RA+ CD8+ T cell         | 4         | IVW    |  | 1.07 (1.03 to 1.11) | 0.000 | 0.036 |
| MN                                            | Effector Memory CD8+ T cell | 4         | IVW    |  | 0.93 (0.90 to 0.96) | 0.000 | 0.036 |
| MN                                            | HLA DR+ CD8+ T cell         | 4         | IVW    |  | 0.92 (0.88 to 0.96) | 0.000 | 0.036 |



| Exposure               | Outcome                | No.of.SNP | Method                    | OR(95% CI)          | P     |
|------------------------|------------------------|-----------|---------------------------|---------------------|-------|
| Membranous nephropathy | basophil cell count    | 2         | Inverse variance weighted | 1.00 (1.00 to 1.01) | 0.253 |
| Membranous nephropathy | monocyte cell count    | 2         | Inverse variance weighted | 1.00 (0.99 to 1.01) | 0.888 |
| Membranous nephropathy | eosinophil cell count  | 2         | Inverse variance weighted | 1.00 (0.99 to 1.00) | 0.415 |
| Membranous nephropathy | white blood cell count | 1         | Wald ratio                | 1.00 (0.99 to 1.02) | 0.625 |
| Membranous nephropathy | lymphocyte cell count  | 1         | Wald ratio                | 1.01 (0.99 to 1.02) | 0.362 |
| Membranous nephropathy | neutrophil cell count  | 1         | Wald ratio                | 1.00 (0.99 to 1.02) | 0.596 |
| basophil cell count    | Membranous nephropathy | 81        | Inverse variance weighted | 0.75 (0.47 to 1.18) | 0.212 |
|                        |                        |           | MR Egger                  | 0.40 (0.14 to 1.12) | 0.085 |
|                        |                        |           | Weighted median           | 0.77 (0.39 to 1.52) | 0.446 |
|                        |                        |           | Weighted mode             | 0.94 (0.22 to 4.03) | 0.933 |
| eosinophil cell count  | Membranous nephropathy | 192       | Inverse variance weighted | 1.01 (0.79 to 1.27) | 0.965 |
|                        |                        |           | MR Egger                  | 1.01 (0.64 to 1.59) | 0.960 |
|                        |                        |           | Weighted median           | 1.03 (0.68 to 1.55) | 0.892 |
|                        |                        |           | Weighted mode             | 1.38 (0.75 to 2.55) | 0.305 |
| lymphocyte cell count  | Membranous nephropathy | 224       | Inverse variance weighted | 1.00 (0.78 to 1.28) | 0.986 |
|                        |                        |           | MR Egger                  | 1.06 (0.62 to 1.83) | 0.821 |
|                        |                        |           | Weighted median           | 0.95 (0.63 to 1.43) | 0.817 |
|                        |                        |           | Weighted mode             | 0.97 (0.53 to 1.78) | 0.930 |
| monocyte cell count    | Membranous nephropathy | 233       | Inverse variance weighted | 0.98 (0.81 to 1.20) | 0.878 |
|                        |                        |           | MR Egger                  | 0.90 (0.64 to 1.27) | 0.552 |
|                        |                        |           | Weighted median           | 0.93 (0.69 to 1.27) | 0.651 |
|                        |                        |           | Weighted mode             | 0.92 (0.66 to 1.30) | 0.643 |
| neutrophil cell count  | Membranous nephropathy | 182       | Inverse variance weighted | 0.82 (0.62 to 1.09) | 0.173 |
|                        |                        |           | MR Egger                  | 0.49 (0.27 to 0.91) | 0.026 |
|                        |                        |           | Weighted median           | 0.79 (0.51 to 1.22) | 0.285 |
|                        |                        |           | Weighted mode             | 0.69 (0.36 to 1.31) | 0.255 |
| white blood cell count | Membranous nephropathy | 217       | Inverse variance weighted | 0.80 (0.62 to 1.05) | 0.106 |
|                        |                        |           | MR Egger                  | 0.58 (0.33 to 1.04) | 0.068 |
|                        |                        |           | Weighted median           | 0.80 (0.53 to 1.22) | 0.308 |
|                        |                        |           | Weighted mode             | 0.93 (0.45 to 1.93) | 0.844 |

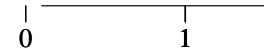

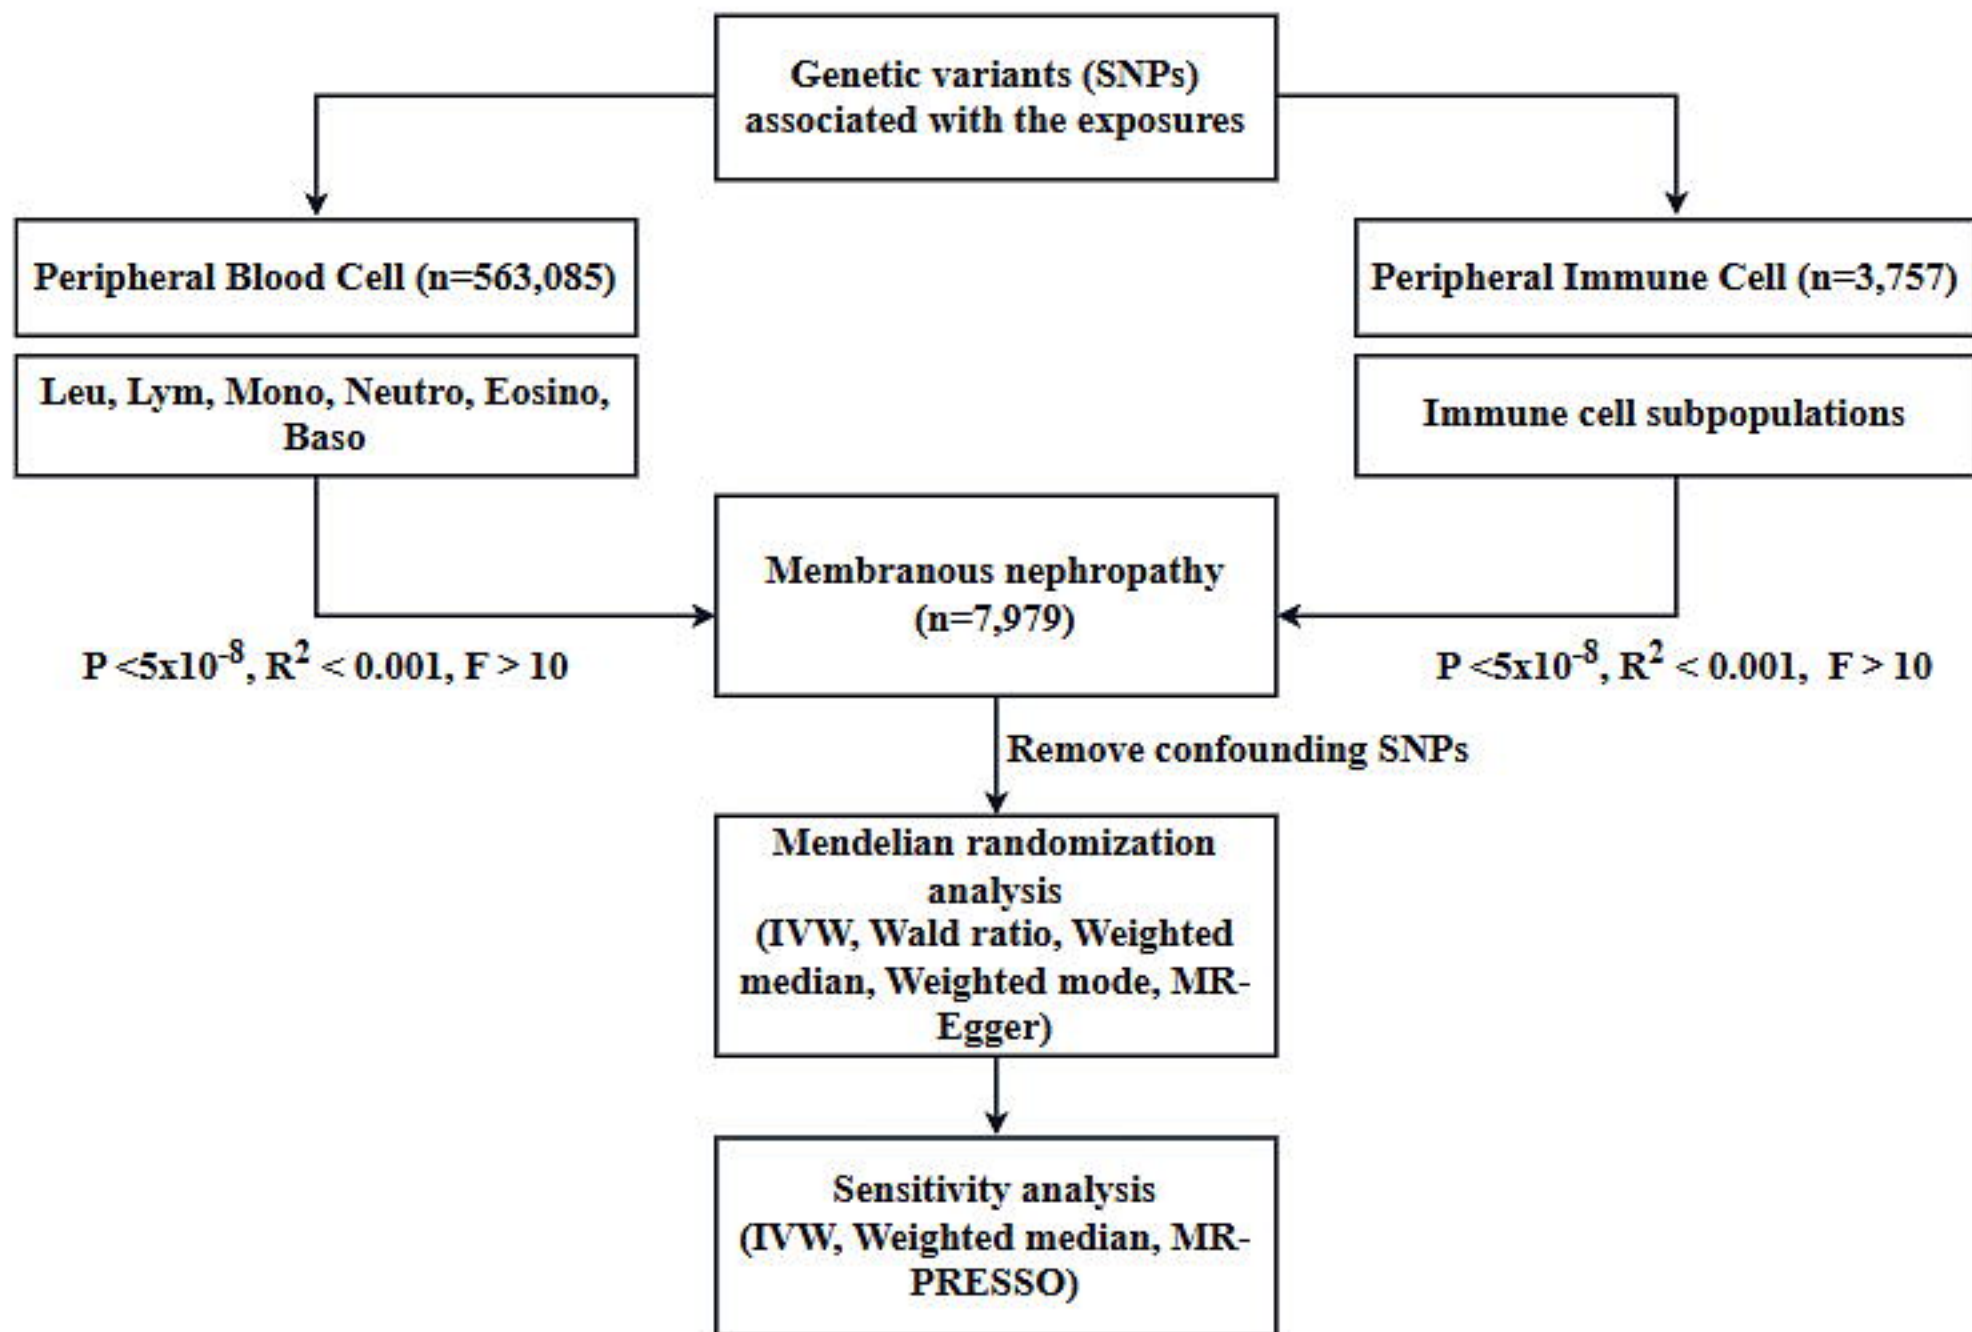

Source: https://medrxiv.org/content/medrxiv/early/2023/11/27/2023.11.27.23299065.full.pdf
